# Supplementary material
Source: Frontiers journal article supplement (https://www.frontiersin.org/articles/303864)

**Supplementary Figure S1.** (A) A representative blot of Na<sup>+</sup>/K<sup>+</sup>-ATPase  $\alpha$ 1c (Nka $\alpha$ 1c) using the custom-made anti-Nka $\alpha$ 1c antibody. (B) A representative blot of Nka $\alpha$ 1c using the anti-Nka $\alpha$ 1c antibody pre-incubated with the immunizing peptide in the peptide competition test.

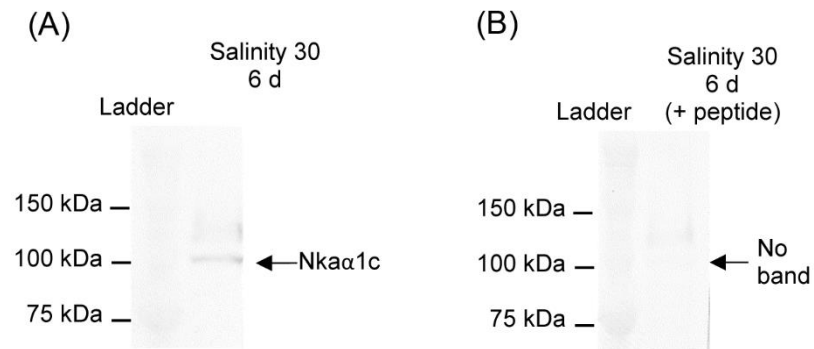

Supplement: Image_1.PDF [file Image_1.PDF]
