# Supplementary material
Source: Frontiers journal article supplement (https://www.frontiersin.org/articles/303864)

**Supplementary Figure S2.** Immunofluorescent labelling of Na<sup>+</sup>/K<sup>+</sup>-ATPase  $\alpha$ -subunit (Nka $\alpha$ ) in the gills of *Anabas testudineus* exposed to seawater (salinity 30) for 6 days (d) using the commercially available anti-NKA $\alpha$ Rb1 antibody which is known to react comprehensively with NKA $\alpha$ , the custom-made anti-Nka $\alpha$ 1b antibody which binds specifically with Nka $\alpha$ 1b, or the custom-made anti-Nka $\alpha$ 1c antibody which binds specifically with Nka $\alpha$ 1c. An example of micrographs of two consecutive sections of the gills of *A. testudineus* **(A)** stained with anti-NKA $\alpha$ Rb1 and anti-Nka $\alpha$ 1b antibodies or **(B)** stained with anti-NKA $\alpha$ Rb1 and anti-Nka $\alpha$ 1c antibodies. Arrows in **(A)** denote the ionocytes expressing Nka $\alpha$ 1b while the arrowheads in **(A)** indicate the ionocytes that presumably express Nka $\alpha$ 1c (refer to **B**). Arrowheads in **(B)** denote the ionocytes expressing Nka $\alpha$ 1c while the arrows in **(B)** indicate the ionocytes that express presumably Nka $\alpha$ 1b (refer to **A**). Scale bar: 20  $\mu$ m.

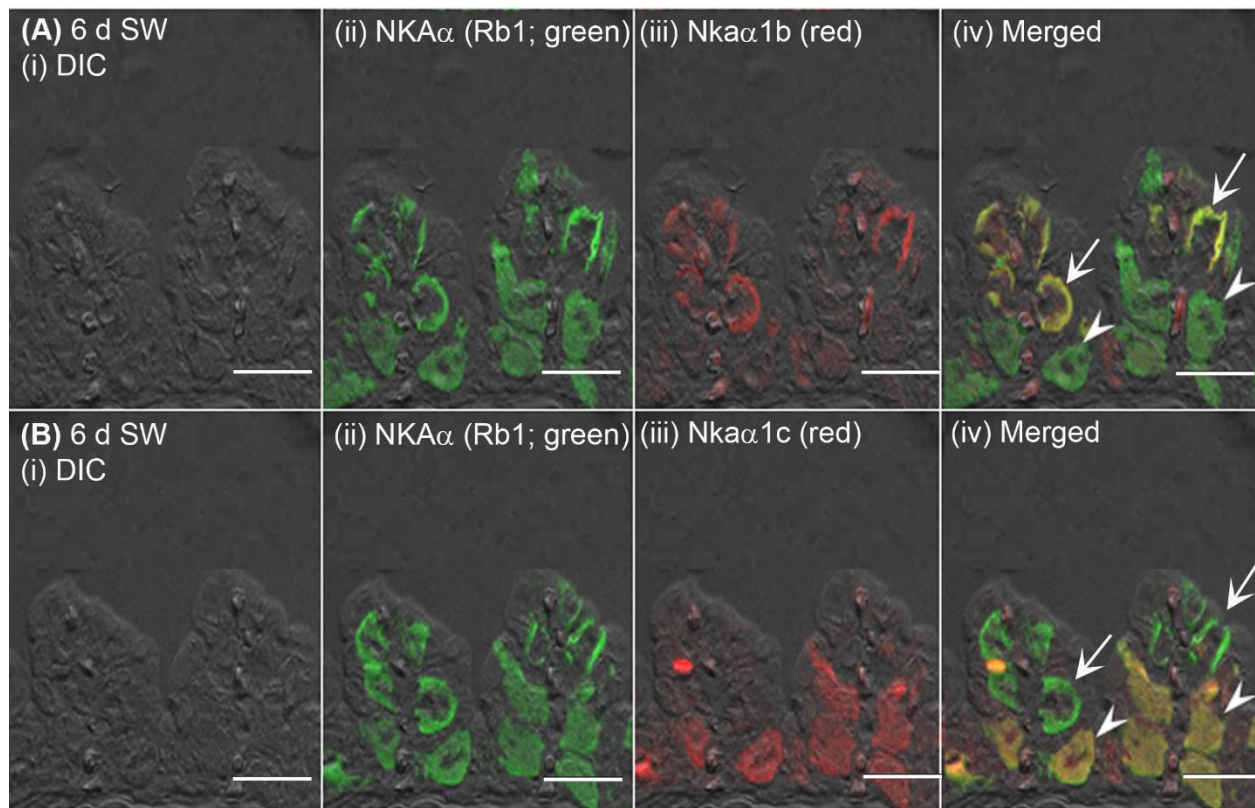

Supplement: Image_2.PDF [file Image_2.PDF]
